# Supplementary material
Source: PubMed Central journal article supplement (PMC3165369)
Supplement: supp_77_17_6043__1.pdf [file supp_77_17_6043__1.pdf]

**Supplementary TABLE S1. Primers and qPCR protocols<sup>a</sup>**

| Assay Nr.                                 | Name of Primer   | Seq. (5'-3') <sup>b</sup>                                   | Annealing temp. (°C) | Target gene (taxon)                                                 | Product length (bp) | Target seq. (accession nr.) | Non-target seq. (accession nr.)       | Reference |
|-------------------------------------------|------------------|-------------------------------------------------------------|----------------------|---------------------------------------------------------------------|---------------------|-----------------------------|---------------------------------------|-----------|
| <b>Family-Specific Assays<sup>c</sup></b> |                  |                                                             |                      |                                                                     |                     |                             |                                       |           |
| 1                                         | Gm5F<br>Micro1R  | CCTACGGGAGGCAGCAG<br>GGAC <u>CT</u> TTTCAC <u>GC</u> GAGACG | 66.4                 | 16S rRNA<br>( <i>Micrococcaceae</i> &<br><i>Cellulomonadaceae</i> ) | 270                 | oxB151<br>(FN433954)        | anoxB58<br>(FN433940)                 | this work |
| 2                                         | Gm5F<br>Kin3R    | CCTACGGGAGGCAGCAG<br>CAGGCCCG <u>GG</u> TT <u>AA</u>        | 67.5                 | 16S rRNA<br>( <i>Kineosporiaceae</i> &<br><i>Nocardioideae</i> )    | 290                 | anoxC150<br>(FN434006)      | oxG32<br>(FN433963)                   | this work |
| 3                                         | Gm5F<br>CloSac1R | CCTACGGGAGGCAGCAG<br><u>A</u> GAGGTCAT <u>G</u> ACAAC       | 64.0                 | 16S rRNA<br>(Cluster I <i>Clostridiaceae</i> )                      | 550                 | anoxB228<br>(FN433944)      | anoxB112<br>(FN433943)                | this work |
| 4                                         | Pla4F<br>PlaGm5R | GGGAAC <u>CCG</u> CGCGTAAGGGGC<br>CTGCAGCCACCCGTGG          | 67.0                 | 16S rRNA<br>( <i>Planctomycetaceae</i> )                            | 250                 | oxC15<br>(FN434018)         | oxC115<br>(FR773529)                  | this work |
| 5                                         | Gm5F<br>Cel4R    | CCTACGGGAGGCAGCAG<br>CGATGCTTATTC <u>A</u> TACAC            | 56.0                 | 16S rRNA<br>(‘Cellu’) <sup>c</sup>                                  | 160                 | anoxC102<br>(FN433999)      | oxC101<br>(FR773528)                  | this work |
| 6                                         | Gm5F<br>Sph1R    | CCTACGGGAGGCAGCAG<br><u>CTG</u> TCAATTCGCCT                 | 63.4                 | 16S rRNA<br>(‘Sphingo’) <sup>c</sup>                                | 350                 | oxC47<br>(FN434021)         | <i>S. myxococcoides</i><br>(AJ310654) | this work |
| 7                                         | Gm5F<br>Deh1R    | CCTACGGGAGGCAGCAG<br><u>CGACTT</u> <u>G</u> AACGACCGCCT     | 66.3                 | 16S rRNA<br>(‘Deha’) <sup>c</sup>                                   | 260                 | oxC11<br>(FN434016)         | anoxG57<br>(FR773527)                 | this work |

## Supplementary TABLE S1, continued.

| Assay Nr.                           | Name of Primer     | Seq. (5'-3') <sup>b</sup>                 | Annealing temp. (°C) | Target gene (taxon)             | Product length (bp) | Target seq. (accession nr.) | Non-target seq. (accession nr.) | Reference |
|-------------------------------------|--------------------|-------------------------------------------|----------------------|---------------------------------|---------------------|-----------------------------|---------------------------------|-----------|
| <b>Domain-Specific Assay</b>        |                    |                                           |                      |                                 |                     |                             |                                 |           |
| 8                                   | Eub341F<br>Eub534R | CCTACGGGAGGCAGCAG<br>ATTACCGCGGCTGCTGG    | 55.7                 | 16S rRNA<br>( <i>Bacteria</i> ) | 190                 | ---                         | ---                             | 2         |
| <b>Inhibition Correction Assays</b> |                    |                                           |                      |                                 |                     |                             |                                 |           |
| 9                                   | lhcF<br>lhcR       | ATTGGGCCCGACGTC<br>ATTTAGGTGACACTATAGAATA | 60.0                 | pGEM-T vector insert            | 450                 | ---                         | ---                             | 3         |
| 10                                  | T7PromF<br>M13Rev  | TAATACGACTATAGGG<br>CAGGAAACAGCTATGACC    | 61.2                 | pGEM-T vector insert            | 450                 | ---                         | ---                             | 3         |

<sup>a</sup> Numbers in the names of primers indicate the 5'-position of binding sites relative to the reference sequence of *E.coli* [ACCX80725]. Abbreviations: F, forward primer; R, reverse primer. The final concentration of each primer was 750 nM for assay numbers 1, 3, 4, 7, 8, 9, and 10. The final concentration of each primer was 500 nM (forward primer) and 1500 nM (reverse primer) for assay numbers 2, 5, and 6.

<sup>b</sup> Y stands for either C or T. Bold and underlined bases in primer sequence indicate mismatches to non-target control.

<sup>c</sup> Names and affiliation of family-level taxa are as previously published (1).

**Supplementary TABLE S2.** Numbers of 16S rRNA gene transcripts that were used as reference (set to 100 %) for normalization of relative abundances of sequences of target taxa in Fig. 3.

| Target taxon (Phylum)                                                         | 16S rRNA <sub>Taxon</sub> [16S rRNA <sub>Bacteria</sub> ] <sup>-1</sup> | Time point (h) |
|-------------------------------------------------------------------------------|-------------------------------------------------------------------------|----------------|
| <i>Micrococcaceae</i> & <i>Cellulomonadaceae</i><br>( <i>Actinobacteria</i> ) | $6.5 \times 10^{-3}$                                                    | 48             |
| <i>Kineosporiaceae</i> & <i>Nocardioideaceae</i><br>( <i>Actinobacteria</i> ) | $9.3 \times 10^{-7}$                                                    | 0              |
| Cluster I <i>Clostridiaceae</i><br>( <i>Firmicutes</i> )                      | $7.9 \times 10^{-5}$                                                    | 192            |
| <i>Planctomycetaceae</i><br>( <i>Planctomycetes</i> )                         | $1.2 \times 10^{-5}$                                                    | 0              |
| 'Cellu'<br>(novel <i>Bacteroidetes</i> )                                      | $1.8 \times 10^{-6}$                                                    | 168            |
| 'Sphingo'<br>(novel <i>Bacteroidetes</i> )                                    | $1.1 \times 10^{-5}$                                                    | 0              |
| 'Deha'<br>(novel <i>Chloroflexi</i> )                                         | $1.3 \times 10^{-3}$                                                    | 0              |

**Supplementary Table S3.** Numbers of 16S rRNA gene transcripts of detected bacterial taxa in soil slurries<sup>a</sup>

| Treatment: Taxon                                 | 16S rRNA <sub>Taxon</sub> [16S rRNA <sub>Bacteria</sub> ] <sup>-1</sup> <sup>b</sup> |                                |                                |                                |                                |
|--------------------------------------------------|--------------------------------------------------------------------------------------|--------------------------------|--------------------------------|--------------------------------|--------------------------------|
|                                                  | 0 h                                                                                  | 48 h                           | 102 h                          | 168 h                          | 192 h                          |
| Cellobiose treatment:                            |                                                                                      |                                |                                |                                |                                |
| <i>Micrococcaceae</i> & <i>Cellulomonadaceae</i> | $(1.1 \pm 0.1) \times 10^{-4}$                                                       | $(6.5 \pm 2.1) \times 10^{-3}$ | $(6.0 \pm 1.3) \times 10^{-3}$ | $(3.6 \pm 0.6) \times 10^{-3}$ | $(4.0 \pm 0.7) \times 10^{-3}$ |
| <i>Kineosporiaceae</i> & <i>Nocardioideaceae</i> | $(9.3 \pm 5.8) \times 10^{-7}$                                                       | $(2.5 \pm 0.6) \times 10^{-7}$ | $(1.3 \pm 0.6) \times 10^{-7}$ | $2.0 \times 10^{-7}$           | $(2.0 \pm 0.5) \times 10^{-7}$ |
| Cluster I<br><i>Clostridiaceae</i>               | $(9.4 \pm 3.1) \times 10^{-7}$                                                       | $(1.5 \pm 0.7) \times 10^{-6}$ | $(1.2 \pm 1.0) \times 10^{-5}$ | $(7.5 \pm 6.3) \times 10^{-5}$ | $(8.0 \pm 2.5) \times 10^{-5}$ |
| <i>Planctomycetaceae</i>                         | $(1.2 \pm 0.4) \times 10^{-5}$                                                       | $(1.1 \pm 0.5) \times 10^{-6}$ | $(1.1 \pm 0.4) \times 10^{-6}$ | $(4.5 \pm 2.0) \times 10^{-7}$ | $(8.0 \pm 1.3) \times 10^{-7}$ |
| 'Cellu' <sup>c</sup>                             | $(9.0 \pm 2.3) \times 10^{-8}$                                                       | $(2.1 \pm 1.0) \times 10^{-7}$ | $1.6 \times 10^{-6}$           | $1.8 \times 10^{-6}$           | $(1.6 \pm 0.6) \times 10^{-6}$ |
| 'Sphingo' <sup>c</sup>                           | $(1.1 \pm 0.3) \times 10^{-5}$                                                       | $(3.1 \pm 0.9) \times 10^{-6}$ | $(2.1 \pm 0.5) \times 10^{-6}$ | $(4.5 \pm 0.8) \times 10^{-6}$ | $(2.2 \pm 0.3) \times 10^{-6}$ |
| 'Deha' <sup>c</sup>                              | $(1.3 \pm 0.2) \times 10^{-3}$                                                       | $(2.8 \pm 0.4) \times 10^{-4}$ | $(2.7 \pm 0.5) \times 10^{-4}$ | $(2.0 \pm 1.0) \times 10^{-4}$ | $(3.1 \pm 0.3) \times 10^{-4}$ |
| Unsupplemented control:                          |                                                                                      |                                |                                |                                |                                |
| <i>Micrococcaceae</i> & <i>Cellulomonadaceae</i> | $(2.0 \pm 0.4) \times 10^{-4}$                                                       | $(1.2 \pm 0.2) \times 10^{-4}$ | $(1.4 \pm 0.4) \times 10^{-4}$ | $(1.3 \pm 0.2) \times 10^{-4}$ | $(8.7 \pm 3.5) \times 10^{-5}$ |
| <i>Kineosporiaceae</i> & <i>Nocardioideaceae</i> | $(8.6 \pm 4.1) \times 10^{-7}$                                                       | $(6.5 \pm 1.4) \times 10^{-7}$ | $(6.1 \pm 0.9) \times 10^{-7}$ | $(6.4 \pm 1.2) \times 10^{-7}$ | $(7.7 \pm 5.9) \times 10^{-7}$ |
| Cluster I<br><i>Clostridiaceae</i>               | $(1.0 \pm 0.5) \times 10^{-6}$                                                       | $(9.9 \pm 3.5) \times 10^{-7}$ | $(8.7 \pm 4.2) \times 10^{-7}$ | $(1.4 \pm 0.4) \times 10^{-6}$ | $(2.4 \pm 1.3) \times 10^{-6}$ |
| <i>Planctomycetaceae</i>                         | $(2.4 \pm 0.6) \times 10^{-5}$                                                       | $(1.4 \pm 0.3) \times 10^{-5}$ | $(8.6 \pm 2.1) \times 10^{-6}$ | $(1.3 \pm 0.2) \times 10^{-5}$ | $(7.9 \pm 3.4) \times 10^{-6}$ |
| 'Cellu' <sup>c</sup>                             | $(4.2 \pm 1.6) \times 10^{-8}$                                                       | $(5.3 \pm 1.1) \times 10^{-8}$ | $(4.2 \pm 1.2) \times 10^{-8}$ | $(4.6 \pm 1.0) \times 10^{-8}$ | $(5.5 \pm 2.8) \times 10^{-8}$ |
| 'Sphingo' <sup>c</sup>                           | $(1.1 \pm 0.9) \times 10^{-5}$                                                       | $(7.5 \pm 4.0) \times 10^{-6}$ | $(7.4 \pm 2.3) \times 10^{-6}$ | $(5.0 \pm 0.2) \times 10^{-6}$ | $(6.6 \pm 3.2) \times 10^{-6}$ |
| 'Deha' <sup>c</sup>                              | $(9.2 \pm 0.9) \times 10^{-4}$                                                       | $(7.1 \pm 1.3) \times 10^{-4}$ | $(6.6 \pm 1.4) \times 10^{-4}$ | $(8.2 \pm 0.9) \times 10^{-4}$ | $(5.8 \pm 2.3) \times 10^{-4}$ |

<sup>a</sup> Assignment to a family was based on a minimal 16S rRNA gene similarity of 87% (4).

<sup>b</sup> Values are the means of two replicates (without standard deviation) or three replicates (with standard deviation).

<sup>c</sup> Name and affiliation as defined elsewhere (1).

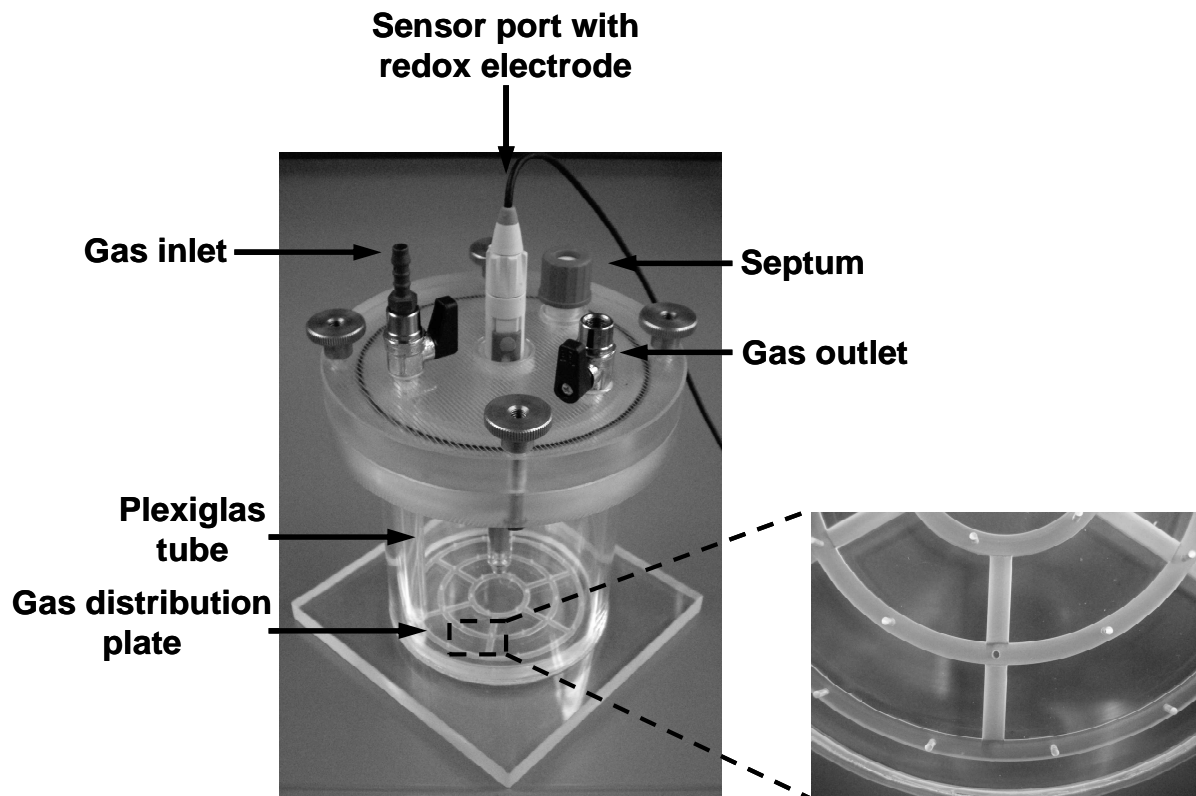

Supplemental FIG. S1. Incubation chamber. Sensor port was used for pH and redox potential measurements. Sterile synthetic air or  $N_2$  were supplied at a gas inlet, and slurries were aerated from below by a gas distribution plate. Liquid samples were taken at the septum with a sterile syringe. Gas was released from the gas outlet. Valves of gas inlet and outlet were closed during anoxic incubation, but at the oxic phases synthetic air was permanently flushed through the soil slurry.

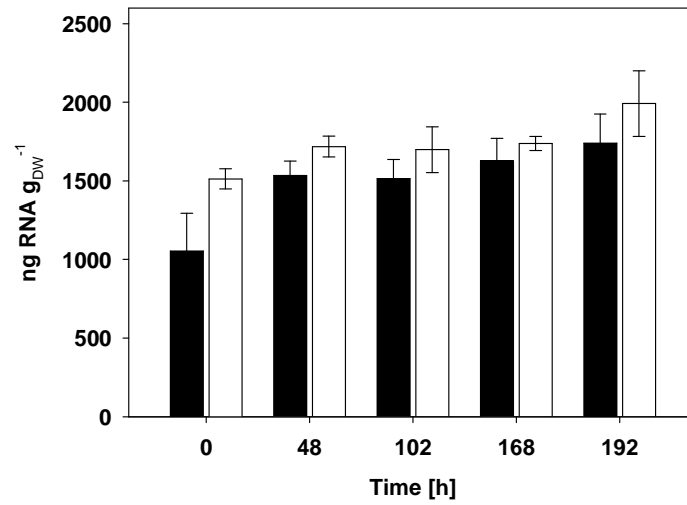

Supplemental FIG. S2. Total RNA extracted from each sampling period of each treatment exposed to fluctuating availabilities of O<sub>2</sub>. Filled bars, cellobiose treatments; empty bars, unsupplemented control treatments.

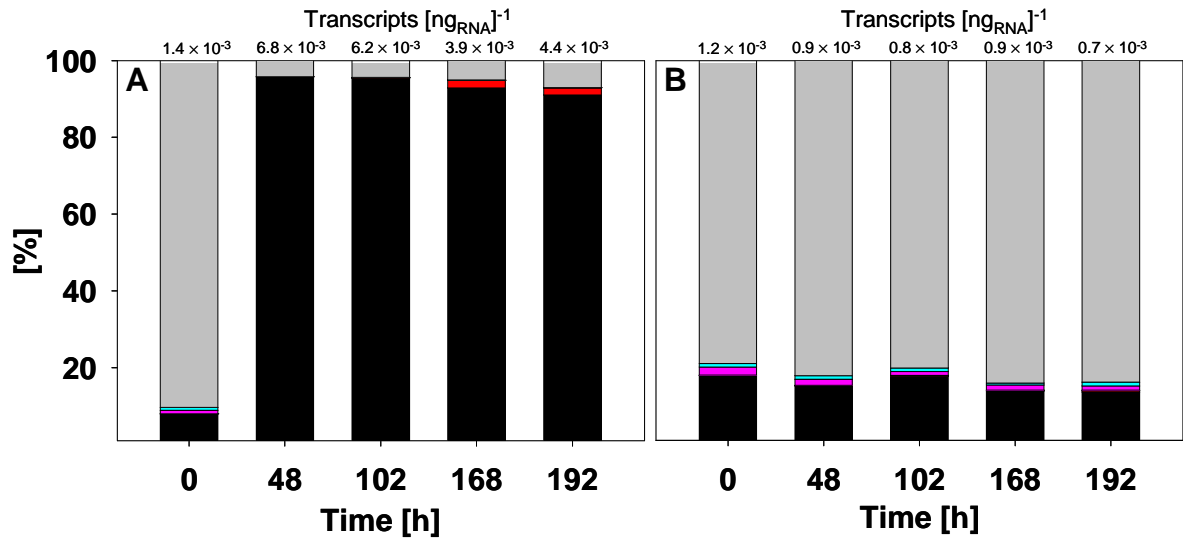

Supplemental FIG. S3. Relative abundances of taxa in (A) cellobiose treatments, and (B) unsupplemented control treatments. 100 % corresponds to the total number of transcripts of all taxa.

'Deha' (*Chloroflexi*)   
  *Planctomycetaceae*   
  *Micrococcaceae & Cellulomonadaceae*  
 *Clostridia I*   
  'Cellu' (*Bacteroidetes*)   
  *Kineosporiaceae & Nocardioideaceae*  
 'Sphingo' (*Bacteroidetes*)

## References for Supplemental Material

1. **Schellenberger, S., S. Kolb, and H.L. Drake.** 2010. Metabolic responses of novel cellulolytic and saccharolytic agricultural soil bacteria to oxygen. *Environ. Microbiol.* **12**:845-861.
2. **Muyzer, G., E.C. De Waal, and A.G. Uitterlinden.** 1993. Profiling of complex microbial populations by denaturing gradient gel electrophoresis analysis of polymerase chain reaction-amplified genes coding for 16S rRNA. *Appl. Environ. Microbiol.* **59**:695-700.
3. **Wieczorek, A.S., H.L. Drake, and S. Kolb.** 2010. Organic acids and ethanol inhibit oxidation of methane by mire methanotrophs. *FEMS Microbiol. Ecol.*, in press.
4. **Yarza, P., M. Richter, J. Peplies, J. Euzéby, R. Amann, K.H. Schleifer, W. Ludwig, F.A. Glöckner, and R. Rossello-Mora.** 2008. The all-species living tree project: a 16S
